# Supplementary material
Source: Springer Nature journal article supplement (https://www.springermedizin.de/resource/supplementary/12889_2010_3437_MOESM1_ESM.pdf/9488948)
Supplement: MOESM1 [file 9488948]

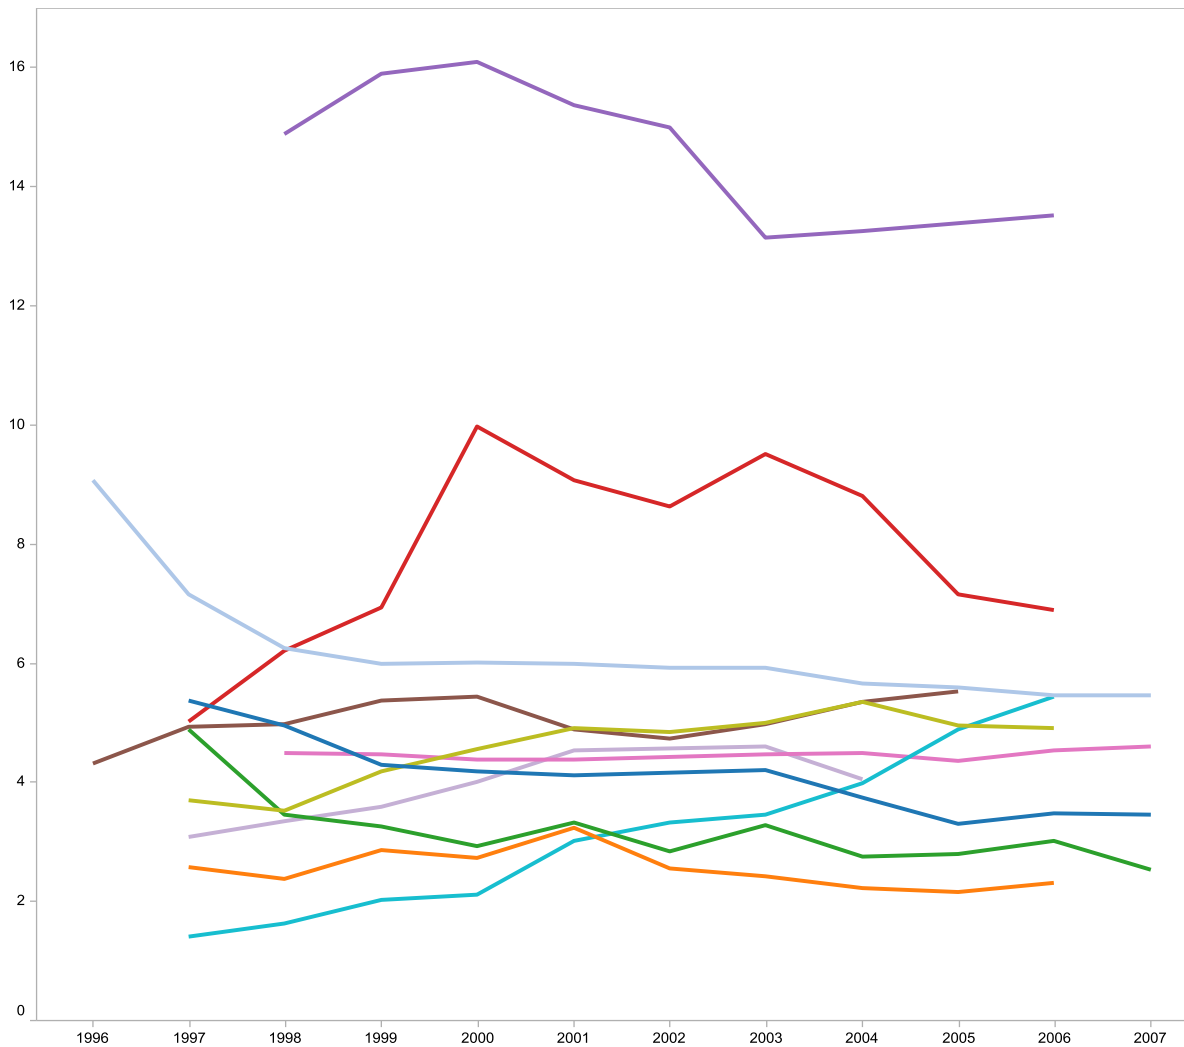

**COUNTRY**

- Argentina
- Brazil
- Chile
- Colombia
- Costa Rica
- Ecuador
- El Salvador
- Mexico
- Panama
- Uruguay
- Venezuela
